# Supplementary material for: The Best of Both Worlds: A Framework for Combining Degradation Prediction with High Performance Super-Resolution Networks
Source: MDPI journal article supplement (doi:10.3390/s23010419), 2022-12-30
Supplement: s1 [file s1]

# Supplementary Material for ‘The Best of Both Worlds: a Framework for Combining Degradation Prediction with High Performance Super-Resolution Networks’

Matthew Aquilina, Keith George Ciantar, Christian Galea, Kenneth P. Camilleri, Reuben A. Farrugia, John Abela

This document contains a number of supplementary results and figures which support the main text. Please refer to the main manuscript for further details.

## Simple Pipeline Results

Table S1: SSIM SR results corresponding to Table 1 from the main paper. ‘low’ refers to a  $\sigma$  of 0.2, ‘med’ refers to a  $\sigma$  of 1.6 and ‘high’ refers to a  $\sigma$  of 3.0. The best result for each set is shown in **red**, while the second-best result is shown in **blue**.

| Model            | Set5          |               |               | Set14         |               |               | BSDS100       |               |               | Manga109      |               |               | Urban100      |               |               |
|------------------|---------------|---------------|---------------|---------------|---------------|---------------|---------------|---------------|---------------|---------------|---------------|---------------|---------------|---------------|---------------|
|                  | low           | med           | high          |
| <b>Baselines</b> |               |               |               |               |               |               |               |               |               |               |               |               |               |               |               |
| Bicubic          | 0.7909        | 0.7513        | 0.6736        | 0.6803        | 0.6384        | 0.5700        | 0.6452        | 0.6058        | 0.5458        | 0.7716        | 0.7323        | 0.6659        | 0.6376        | 0.5941        | 0.5240        |
| Lanczos          | 0.7986        | 0.7625        | 0.6814        | 0.6888        | 0.6487        | 0.5761        | 0.6534        | 0.6149        | 0.5510        | 0.7775        | 0.7418        | 0.6720        | 0.6452        | 0.6044        | 0.5302        |
| <b>Non-Blind</b> |               |               |               |               |               |               |               |               |               |               |               |               |               |               |               |
| RCAN             | 0.8830        | 0.8783        | 0.8564        | 0.7664        | 0.7632        | 0.7314        | 0.7217        | 0.7170        | 0.6897        | 0.9015        | 0.9000        | 0.8728        | 0.7834        | 0.7760        | 0.7357        |
| MA               | 0.8845        | <b>0.8837</b> | 0.8615        | 0.7671        | 0.7669        | <b>0.7408</b> | 0.7221        | 0.7212        | 0.6953        | 0.9041        | 0.9047        | 0.8857        | 0.7849        | 0.7812        | 0.7479        |
| MA (all)         | 0.8836        | 0.8828        | 0.8620        | 0.7667        | 0.7670        | 0.7407        | 0.7216        | 0.7213        | <b>0.6958</b> | 0.9036        | <b>0.9051</b> | <b>0.8863</b> | 0.7837        | 0.7808        | 0.7483        |
| MA (PCA)         | 0.8846        | 0.8834        | 0.8617        | <b>0.7677</b> | 0.7667        | 0.7401        | <b>0.7224</b> | 0.7214        | 0.6951        | 0.9040        | 0.9048        | 0.8852        | <b>0.7852</b> | 0.7812        | 0.7475        |
| SRMD             | 0.8844        | 0.8836        | 0.8622        | 0.7673        | 0.7670        | 0.7406        | 0.7222        | 0.7212        | 0.6956        | 0.9039        | 0.9048        | 0.8855        | 0.7844        | 0.7809        | 0.7477        |
| SFT              | 0.8847        | 0.8832        | <b>0.8627</b> | <b>0.7677</b> | <b>0.7671</b> | 0.7406        | <b>0.7228</b> | 0.7215        | 0.6957        | <b>0.9043</b> | <b>0.9052</b> | <b>0.8863</b> | <b>0.7859</b> | <b>0.7817</b> | 0.7482        |
| DA               | 0.8845        | 0.8836        | <b>0.8628</b> | 0.7676        | <b>0.7673</b> | <b>0.7410</b> | 0.7221        | <b>0.7215</b> | 0.6957        | 0.9040        | 0.9049        | 0.8861        | 0.7846        | <b>0.7816</b> | <b>0.7484</b> |
| DA (all)         | <b>0.8847</b> | <b>0.8837</b> | 0.8622        | 0.7666        | 0.7667        | 0.7401        | 0.7217        | 0.7211        | <b>0.6957</b> | 0.9033        | 0.9050        | 0.8856        | 0.7822        | 0.7807        | 0.7480        |
| DGFMB            | 0.8845        | 0.8836        | 0.8623        | 0.7672        | 0.7669        | 0.7406        | 0.7224        | <b>0.7216</b> | 0.6956        | <b>0.9041</b> | 0.9048        | 0.8860        | 0.7850        | 0.7812        | <b>0.7485</b> |
| DGFMB (no FC)    | <b>0.8849</b> | 0.8834        | 0.8625        | 0.7673        | 0.7669        | 0.7406        | 0.7224        | 0.7211        | 0.6954        | 0.9040        | 0.9046        | 0.8856        | 0.7851        | 0.7810        | 0.7479        |

Table S2: SSIM SR results corresponding to Table 3 from the main paper. ‘low’ refers to a  $\sigma$  of 0.2, ‘med’ refers to a  $\sigma$  of 1.6 and ‘high’ refers to a  $\sigma$  of 3.0. The best result for each set is shown in **red**, while the second-best result is shown in **blue**.

| Model                               | Set5          |               |               | Set14         |               |               | BSDS100       |               |               | Manga109      |               |               | Urban100      |               |               |
|-------------------------------------|---------------|---------------|---------------|---------------|---------------|---------------|---------------|---------------|---------------|---------------|---------------|---------------|---------------|---------------|---------------|
|                                     | low           | med           | high          |
| <b>Classical</b>                    |               |               |               |               |               |               |               |               |               |               |               |               |               |               |               |
| Bicubic                             | 0.7909        | 0.7513        | 0.6736        | 0.6803        | 0.6384        | 0.5700        | 0.6452        | 0.6058        | 0.5458        | 0.7716        | 0.7323        | 0.6659        | 0.6376        | 0.5941        | 0.5240        |
| Lanczos                             | 0.7986        | 0.7625        | 0.6814        | 0.6888        | 0.6487        | 0.5761        | 0.6534        | 0.6149        | 0.5510        | 0.7775        | 0.7418        | 0.6720        | 0.6452        | 0.6044        | 0.5302        |
| <b>Pretrained</b>                   |               |               |               |               |               |               |               |               |               |               |               |               |               |               |               |
| IKC (pretrained-best-iter)          | <b>0.8832</b> | 0.8751        | <b>0.8604</b> | 0.7658        | 0.7486        | <b>0.7382</b> | 0.7214        | 0.7083        | <b>0.6912</b> | <b>0.9019</b> | 0.8763        | 0.8612        | 0.7769        | 0.7488        | 0.7262        |
| IKC (pretrained-last-iter)          | 0.8827        | 0.8663        | 0.8585        | <b>0.7675</b> | 0.7436        | 0.7269        | <b>0.7233</b> | 0.6967        | 0.6872        | 0.9015        | 0.8694        | 0.8454        | 0.7754        | 0.7389        | 0.7149        |
| DASR (pretrained)                   | 0.8797        | 0.8747        | 0.8539        | 0.7617        | 0.7512        | 0.7205        | 0.7177        | 0.7087        | 0.6796        | 0.8960        | 0.8909        | 0.8690        | 0.7665        | 0.7521        | 0.7182        |
| DANv1 (pretrained)                  | 0.8828        | <b>0.8787</b> | <b>0.8610</b> | 0.7657        | <b>0.7594</b> | <b>0.7331</b> | 0.7211        | <b>0.7144</b> | <b>0.6877</b> | 0.9011        | <b>0.9007</b> | <b>0.8839</b> | <b>0.7793</b> | <b>0.7706</b> | <b>0.7401</b> |
| DANv2 (pretrained)                  | <b>0.8849</b> | <b>0.8812</b> | 0.8589        | <b>0.7678</b> | <b>0.7617</b> | 0.7329        | <b>0.7233</b> | <b>0.7171</b> | 0.6868        | <b>0.9028</b> | <b>0.9009</b> | <b>0.8827</b> | <b>0.7850</b> | <b>0.7736</b> | <b>0.7395</b> |
| <b>Non-Blind</b>                    |               |               |               |               |               |               |               |               |               |               |               |               |               |               |               |
| RCAN-MA (true sigma)                | <b>0.8845</b> | <b>0.8837</b> | <b>0.8615</b> | <b>0.7671</b> | <b>0.7669</b> | <b>0.7408</b> | 0.7221        | <b>0.7212</b> | <b>0.6953</b> | <b>0.9041</b> | <b>0.9047</b> | <b>0.8857</b> | <b>0.7849</b> | <b>0.7812</b> | <b>0.7479</b> |
| HAN-MA (true sigma)                 | <b>0.8842</b> | <b>0.8831</b> | <b>0.8611</b> | <b>0.7671</b> | <b>0.7670</b> | <b>0.7407</b> | <b>0.7222</b> | <b>0.7213</b> | <b>0.6956</b> | <b>0.9043</b> | <b>0.9050</b> | <b>0.8862</b> | <b>0.7850</b> | <b>0.7814</b> | <b>0.7483</b> |
| RCAN-MA (noisy sigma)               | 0.8839        | 0.8808        | 0.8589        | 0.7669        | 0.7639        | 0.7328        | <b>0.7223</b> | 0.7177        | 0.6902        | 0.9025        | 0.9010        | 0.8754        | 0.7825        | 0.7741        | 0.7343        |
| <b>RCAN/DAN</b>                     |               |               |               |               |               |               |               |               |               |               |               |               |               |               |               |
| DANv1                               | 0.8791        | 0.8749        | 0.8511        | 0.7608        | 0.7569        | 0.7261        | 0.7170        | 0.7120        | 0.6840        | 0.8921        | 0.8911        | 0.8652        | 0.7620        | 0.7550        | 0.7187        |
| DANv1 (cosine)                      | 0.8820        | 0.8774        | 0.8540        | 0.7638        | 0.7604        | 0.7305        | 0.7195        | 0.7149        | 0.6870        | 0.8980        | 0.8961        | 0.8720        | 0.7721        | 0.7642        | 0.7269        |
| RCAN (batch size 4)                 | 0.8830        | 0.8792        | 0.8564        | 0.7662        | 0.7636        | <b>0.7329</b> | 0.7221        | 0.7174        | 0.6900        | 0.9019        | 0.9007        | 0.8760        | <b>0.7816</b> | 0.7743        | 0.7351        |
| RCAN-DAN                            | <b>0.8840</b> | <b>0.8796</b> | <b>0.8583</b> | <b>0.7669</b> | <b>0.7644</b> | 0.7323        | <b>0.7223</b> | <b>0.7183</b> | <b>0.6902</b> | <b>0.9027</b> | <b>0.9019</b> | <b>0.8776</b> | <b>0.7828</b> | <b>0.7754</b> | <b>0.7360</b> |
| RCAN-DAN (sigma)                    | <b>0.8838</b> | <b>0.8807</b> | <b>0.8591</b> | <b>0.7676</b> | <b>0.7654</b> | <b>0.7328</b> | <b>0.7229</b> | <b>0.7193</b> | <b>0.6908</b> | <b>0.9029</b> | <b>0.9019</b> | <b>0.8775</b> | 0.7811        | <b>0.7757</b> | <b>0.7356</b> |
| <b>HAN/DAN</b>                      |               |               |               |               |               |               |               |               |               |               |               |               |               |               |               |
| HAN (batch size 4)                  | <b>0.8837</b> | <b>0.8795</b> | <b>0.8550</b> | <b>0.7668</b> | <b>0.7636</b> | <b>0.7316</b> | <b>0.7221</b> | <b>0.7175</b> | <b>0.6895</b> | <b>0.9017</b> | <b>0.9003</b> | <b>0.8739</b> | <b>0.7822</b> | <b>0.7743</b> | <b>0.7321</b> |
| HAN-DAN                             | <b>0.8842</b> | <b>0.8797</b> | <b>0.8579</b> | <b>0.7671</b> | <b>0.7638</b> | <b>0.7331</b> | <b>0.7225</b> | <b>0.7172</b> | <b>0.6894</b> | <b>0.9027</b> | <b>0.9010</b> | <b>0.8773</b> | <b>0.7829</b> | <b>0.7751</b> | <b>0.7354</b> |
| <b>RCAN/Contrastive</b>             |               |               |               |               |               |               |               |               |               |               |               |               |               |               |               |
| RCAN (batch size 8)                 | 0.8830        | 0.8783        | 0.8564        | 0.7664        | 0.7632        | 0.7314        | 0.7217        | 0.7170        | 0.6897        | 0.9015        | 0.9000        | 0.8728        | <b>0.7834</b> | <b>0.7760</b> | <b>0.7357</b> |
| RCAN-MoCo                           | <b>0.8844</b> | 0.8801        | 0.8577        | 0.7671        | 0.7629        | <b>0.7332</b> | 0.7221        | 0.7174        | 0.6904        | 0.9022        | 0.9008        | 0.8770        | 0.7819        | 0.7742        | 0.7343        |
| RCAN-SupMoCo                        | 0.8839        | <b>0.8804</b> | 0.8578        | 0.7671        | 0.7630        | 0.7329        | 0.7227        | 0.7177        | 0.6901        | 0.9030        | <b>0.9010</b> | <b>0.8771</b> | 0.7831        | 0.7748        | <b>0.7356</b> |
| RCAN-regression                     | 0.8835        | 0.8795        | 0.8559        | 0.7668        | 0.7640        | 0.7331        | <b>0.7229</b> | 0.7180        | 0.6899        | 0.9024        | 0.9005        | <b>0.8772</b> | 0.7825        | 0.7736        | 0.7337        |
| RCAN-SupMoCo-regression             | <b>0.8845</b> | <b>0.8805</b> | 0.8567        | 0.7667        | <b>0.7645</b> | 0.7321        | 0.7223        | 0.7177        | <b>0.6905</b> | <b>0.9031</b> | <b>0.9016</b> | 0.8770        | <b>0.7831</b> | <b>0.7749</b> | 0.7348        |
| RCAN-WeakCon                        | 0.8837        | 0.8794        | <b>0.8582</b> | <b>0.7673</b> | <b>0.7641</b> | <b>0.7334</b> | <b>0.7229</b> | <b>0.7189</b> | <b>0.6905</b> | 0.9027        | 0.9009        | 0.8760        | 0.7826        | 0.7747        | 0.7350        |
| RCAN-SupMoCo (online)               | 0.8836        | 0.8799        | <b>0.8591</b> | <b>0.7673</b> | 0.7634        | 0.7245        | 0.7227        | <b>0.7186</b> | 0.6903        | <b>0.9030</b> | 0.9005        | 0.8763        | 0.7826        | 0.7743        | 0.7317        |
| RCAN-SupMoCo (ResNet)               | 0.8829        | 0.8789        | 0.8570        | 0.7666        | 0.7630        | 0.7292        | 0.7221        | 0.7170        | 0.6882        | 0.9017        | 0.8998        | 0.8629        | 0.7798        | 0.7714        | 0.7250        |
| <b>HAN/Contrastive</b>              |               |               |               |               |               |               |               |               |               |               |               |               |               |               |               |
| HAN (batch size 8)                  | <b>0.8836</b> | <b>0.8802</b> | <b>0.8554</b> | <b>0.7669</b> | <b>0.7638</b> | <b>0.7311</b> | <b>0.7223</b> | <b>0.7180</b> | <b>0.6896</b> | <b>0.9025</b> | <b>0.9013</b> | <b>0.8747</b> | <b>0.7826</b> | <b>0.7754</b> | <b>0.7337</b> |
| HAN-SupMoCo-regression              | <b>0.8835</b> | <b>0.8801</b> | <b>0.8581</b> | <b>0.7665</b> | <b>0.7634</b> | <b>0.7332</b> | <b>0.7220</b> | <b>0.7167</b> | <b>0.6899</b> | <b>0.9019</b> | <b>0.8999</b> | <b>0.8774</b> | <b>0.7815</b> | <b>0.7735</b> | <b>0.7348</b> |
| <b>Extensions</b>                   |               |               |               |               |               |               |               |               |               |               |               |               |               |               |               |
| RCAN-DAN (pretrained estimator)     | <b>0.8839</b> | 0.8794        | <b>0.8576</b> | <b>0.7678</b> | <b>0.7647</b> | <b>0.7332</b> | <b>0.7227</b> | <b>0.7185</b> | <b>0.6908</b> | <b>0.9034</b> | <b>0.9024</b> | <b>0.8769</b> | <b>0.7837</b> | <b>0.7762</b> | <b>0.7363</b> |
| RCAN (batch size 8, long-term)      | 0.8836        | <b>0.8806</b> | <b>0.8580</b> | 0.7670        | 0.7642        | 0.7325        | 0.7222        | 0.7178        | 0.6902        | 0.9027        | 0.9014        | 0.8757        | 0.7834        | 0.7760        | 0.7357        |
| RCAN-SupMoCo-regression (long-term) | <b>0.8842</b> | <b>0.8797</b> | 0.8570        | <b>0.7675</b> | <b>0.7649</b> | <b>0.7333</b> | <b>0.7231</b> | <b>0.7188</b> | <b>0.6913</b> | <b>0.9037</b> | <b>0.9021</b> | <b>0.8786</b> | <b>0.7852</b> | <b>0.7771</b> | <b>0.7377</b> |

Table S3: LPIPS results (smaller is better) for Real-ESRGAN models tested. The datasets are identical to those used for the simple pipeline analysis. The best result for each set is shown in **red**, while the second-best result is shown in **blue**.

| Model                            | Set5          |               |               | Set14         |               |               | BSDS100       |               |               | Manga109      |               |               | Urban100      |               |               |
|----------------------------------|---------------|---------------|---------------|---------------|---------------|---------------|---------------|---------------|---------------|---------------|---------------|---------------|---------------|---------------|---------------|
|                                  | low           | med           | high          |
| Bicubic                          | 0.1131        | 0.1582        | 0.2543        | 0.1672        | 0.2134        | 0.3052        | 0.2040        | 0.2465        | 0.3300        | 0.1398        | 0.1905        | 0.2900        | 0.2117        | 0.2594        | 0.3501        |
| Lanczos                          | 0.1051        | 0.1458        | 0.2442        | 0.1607        | 0.2024        | 0.2956        | 0.1992        | 0.2370        | 0.3216        | 0.1307        | 0.1781        | 0.2798        | 0.2057        | 0.2495        | 0.3409        |
| Real-ESRGAN (batch size 4)       | 0.0211        | <b>0.0266</b> | 0.0468        | 0.0433        | 0.0490        | 0.0738        | 0.0555        | 0.0611        | 0.0878        | 0.0210        | 0.0225        | 0.0340        | 0.0492        | 0.0535        | 0.0789        |
| Real-ESRGAN (batch size 8)       | 0.0250        | 0.0299        | 0.0440        | 0.0447        | 0.0502        | 0.0792        | 0.0553        | 0.0624        | 0.0872        | 0.0208        | 0.0231        | 0.0368        | 0.0525        | 0.0585        | 0.0831        |
| Real-ESRGAN (MA-non-blind)       | <b>0.0200</b> | <b>0.0203</b> | <b>0.0271</b> | <b>0.0418</b> | <b>0.0421</b> | <b>0.0535</b> | <b>0.0518</b> | <b>0.0540</b> | <b>0.0650</b> | <b>0.0181</b> | <b>0.0177</b> | <b>0.0241</b> | <b>0.0463</b> | <b>0.0480</b> | <b>0.0593</b> |
| Real-ESRGAN (SupMoCo-regression) | 0.0227        | 0.0302        | 0.0416        | 0.0478        | 0.0532        | 0.0899        | 0.0607        | 0.0661        | <b>0.0815</b> | 0.0213        | 0.0241        | 0.0327        | 0.0529        | 0.0543        | 0.0767        |
| Real-ESRGAN-DAN                  | <b>0.0185</b> | 0.0275        | <b>0.0392</b> | <b>0.0421</b> | <b>0.0465</b> | <b>0.0663</b> | <b>0.0491</b> | <b>0.0578</b> | 0.0833        | <b>0.0196</b> | <b>0.0217</b> | <b>0.0289</b> | <b>0.0458</b> | <b>0.0509</b> | <b>0.0729</b> |

Table S4: PSNR (dB) results for ELAN models tested. The datasets are identical to those used for the simple pipeline analysis. ELAN (MA-all-non-blind) refers to an ELAN model upgraded with a single meta-attention block, with its attention vector multiplied with the network feature map at 36 points through the network (one for each attention block). The best result for each set is shown in **red**, while the second-best result is shown in **blue**.

| Model                   | Set5          |               |               | Set14         |               |               | BSDS100       |               |               | Manga109      |               |               | Urban100      |               |               |
|-------------------------|---------------|---------------|---------------|---------------|---------------|---------------|---------------|---------------|---------------|---------------|---------------|---------------|---------------|---------------|---------------|
|                         | low           | med           | high          |
| Bicubic                 | 27.084        | 25.857        | 23.867        | 24.532        | 23.695        | 22.286        | 24.647        | 23.998        | 22.910        | 23.608        | 22.564        | 20.932        | 21.805        | 21.104        | 19.944        |
| Lanczos                 | <b>27.462</b> | 26.210        | 24.039        | 24.760        | 23.925        | 22.409        | 24.811        | 24.173        | 23.007        | 23.923        | 22.850        | 21.071        | 21.989        | 21.293        | 20.046        |
| ELAN                    | 27.341        | <b>27.400</b> | <b>24.759</b> | 24.813        | <b>24.715</b> | <b>22.914</b> | 24.815        | <b>24.789</b> | <b>23.403</b> | 24.233        | <b>23.894</b> | <b>21.648</b> | 22.051        | <b>21.982</b> | <b>20.477</b> |
| ELAN (MA-non-blind)     | 27.401        | 27.391        | 24.731        | <b>24.841</b> | 24.714        | 22.899        | <b>24.841</b> | 24.788        | 23.396        | <b>24.255</b> | 23.883        | 21.629        | <b>22.077</b> | 21.977        | 20.465        |
| ELAN (MA-all-non-blind) | <b>30.431</b> | <b>30.405</b> | <b>29.007</b> | <b>26.733</b> | <b>26.728</b> | <b>25.922</b> | <b>26.156</b> | <b>26.177</b> | <b>25.541</b> | <b>28.539</b> | <b>28.764</b> | <b>27.545</b> | <b>24.590</b> | <b>24.546</b> | <b>23.849</b> |

Table S5: SSIM results for ELAN models tested. The datasets are identical to those used for the simple pipeline analysis. ELAN (MA-all-non-blind) refers to an ELAN model upgraded with a single meta-attention block, with its attention vector multiplied with the network feature map at 36 points through the network (one for each attention block). The best result for each set is shown in **red**, while the second-best result is shown in **blue**.

| Model                   | Set5          |               |               | Set14         |               |               | BSDS100       |               |               | Manga109      |               |               | Urban100      |               |               |
|-------------------------|---------------|---------------|---------------|---------------|---------------|---------------|---------------|---------------|---------------|---------------|---------------|---------------|---------------|---------------|---------------|
|                         | low           | med           | high          |
| Bicubic                 | 0.7909        | 0.7513        | 0.6736        | 0.6803        | 0.6384        | 0.5700        | 0.6452        | 0.6058        | 0.5458        | 0.7716        | 0.7323        | 0.6659        | 0.6376        | 0.5941        | 0.5240        |
| Lanczos                 | <b>0.7986</b> | 0.7625        | 0.6814        | 0.6888        | 0.6487        | 0.5761        | 0.6534        | 0.6149        | 0.5510        | 0.7775        | 0.7418        | 0.6720        | 0.6452        | 0.6044        | 0.5302        |
| ELAN                    | 0.7962        | <b>0.7933</b> | <b>0.7078</b> | 0.7074        | 0.6856        | <b>0.5986</b> | 0.6772        | <b>0.6512</b> | <b>0.5709</b> | 0.7805        | 0.7697        | <b>0.6914</b> | 0.6597        | 0.6405        | 0.5528        |
| ELAN (MA-non-blind)     | 0.7970        | 0.7932        | 0.7071        | <b>0.7079</b> | <b>0.6857</b> | 0.5981        | <b>0.6775</b> | 0.6508        | 0.5702        | <b>0.7814</b> | <b>0.7703</b> | 0.6913        | <b>0.6610</b> | <b>0.6411</b> | <b>0.5530</b> |
| ELAN (MA-all-non-blind) | <b>0.8778</b> | <b>0.8773</b> | <b>0.8529</b> | <b>0.7591</b> | <b>0.7585</b> | <b>0.7311</b> | <b>0.7142</b> | <b>0.7133</b> | <b>0.6879</b> | <b>0.8887</b> | <b>0.8895</b> | <b>0.8664</b> | <b>0.7669</b> | <b>0.7637</b> | <b>0.7336</b> |

## Complex Pipeline Results

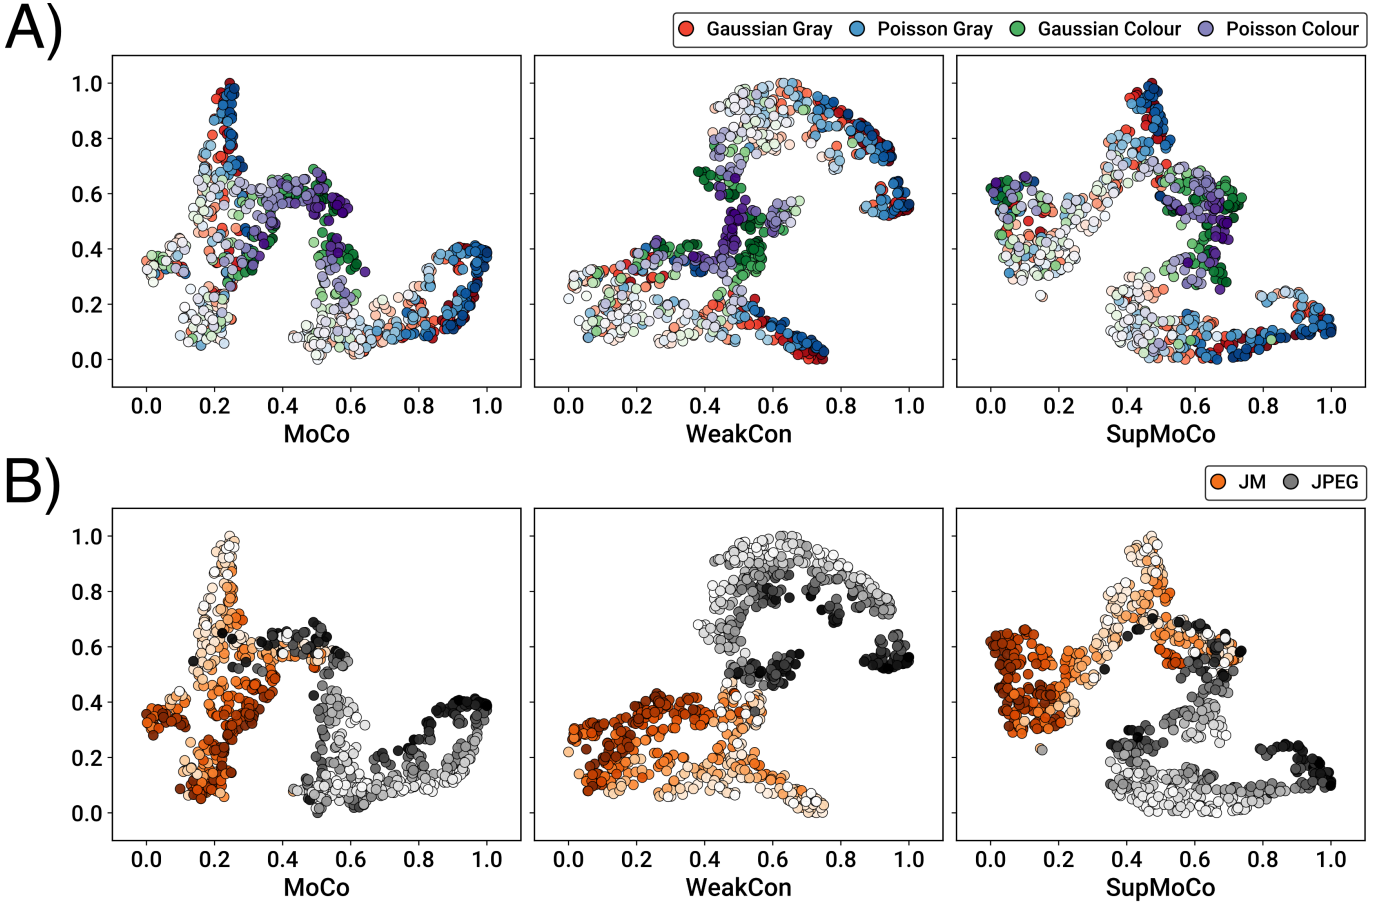

Figure S1: t-SNE plots (perplexity value of 40) showing the separation power of the different contrastive learning algorithms considered on the complex pipeline. All models were evaluated at epoch 2000. The test dataset consisted of 2472 images (8 sets of 309 images of BSDS100/Manga109/Urban100) degraded using the full complex pipeline (random degradation parameters). Only 800 images (randomly selected) are plotted per panel, to reduce cluttering. Each dimension was independently normalised in the range  $[0, 1]$  after computing the t-SNE results. A) t-SNE plots with each image coloured according to the noise applied. The colour intensity of each point corresponds to the noise magnitude (in the range  $[1, 30]$  for Gaussian noise and  $[0.05, 3]$  for Poisson noise). All three encoders are capable of separating noise magnitudes, but lose the ability to distinctly separate the two noise classes. B) t-SNE plots with each image coloured according to the compression applied. The colour intensity of each point corresponds to the compression level, which is in the range  $[30, 95]$  (higher is better) for JPEG and  $[20, 40]$  (lower is better) for JM H.264. All three encoders are capable of separating compression magnitudes, but struggle to separate the two compression types when the compression is very low.

Table S6: SSIM SR results corresponding to Table 6 from the main paper. Please refer to Table 4 in the main paper for full details on each testing scenario. The best result for each set is shown in **red**, while the second-best result is shown in **blue**.

| Dataset  | Model                             | JPEG   | JM     | Poisson | Gaussian | Iso    | Aniso  | Iso + Gaussian | Gaussian + JPEG | Iso + Gaussian + JPEG | Aniso + Poisson + JM | Iso/Aniso + Gaussian/Poisson + JPEG/JM |
|----------|-----------------------------------|--------|--------|---------|----------|--------|--------|----------------|-----------------|-----------------------|----------------------|----------------------------------------|
| BSDS100  | Bicubic                           | 0.5777 | 0.5870 | 0.4443  | 0.4341   | 0.5880 | 0.6075 | 0.3847         | 0.4284          | 0.3932                | 0.4229               | 0.4067                                 |
|          | Lanczos                           | 0.5792 | 0.5911 | 0.4283  | 0.4173   | 0.5964 | 0.6165 | 0.3674         | 0.4133          | 0.3787                | 0.4090               | 0.3922                                 |
|          | RCAN (batch size 4)               | 0.6117 | 0.6213 | 0.6004  | 0.5995   | 0.6660 | 0.6744 | 0.5625         | 0.5749          | 0.5465                | 0.5543               | 0.5503                                 |
|          | RCAN (batch size 8)               | 0.6117 | 0.6211 | 0.6014  | 0.5991   | 0.6649 | 0.6723 | 0.5617         | 0.5751          | 0.5467                | 0.5548               | 0.5505                                 |
|          | RCAN (non-blind)                  | N/A    | N/A    | N/A     | N/A      | N/A    | N/A    | N/A            | N/A             | 0.5482                | 0.5494               | 0.5496                                 |
|          | RCAN (non-blind, no blur)         | N/A    | N/A    | N/A     | N/A      | N/A    | N/A    | N/A            | 0.5788          | 0.5480                | 0.5512               | 0.5503                                 |
|          | RCAN (non-blind, no noise)        | N/A    | N/A    | N/A     | N/A      | N/A    | N/A    | N/A            | N/A             | 0.5483                | 0.5542               | 0.5519                                 |
|          | RCAN (non-blind, no compression)  | N/A    | N/A    | N/A     | N/A      | N/A    | N/A    | 0.5629         | N/A             | 0.5491                | 0.5526               | 0.5499                                 |
|          | RCAN (MoCo)                       | 0.6108 | 0.6217 | 0.6017  | 0.6002   | 0.6590 | 0.6699 | 0.5619         | 0.5750          | 0.5469                | 0.5561               | 0.5511                                 |
|          | RCAN (WeakCon)                    | 0.6115 | 0.6207 | 0.5995  | 0.5942   | 0.6614 | 0.6709 | 0.5568         | 0.5754          | 0.5468                | 0.5557               | 0.5508                                 |
|          | RCAN (SupMoCo)                    | 0.6106 | 0.6220 | 0.5968  | 0.5949   | 0.6612 | 0.6733 | 0.5569         | 0.5754          | 0.5464                | 0.5550               | 0.5504                                 |
|          | RCAN (SupMoCo, all)               | 0.6119 | 0.6225 | 0.6009  | 0.6001   | 0.6655 | 0.6740 | 0.5617         | 0.5755          | 0.5465                | 0.5554               | 0.5507                                 |
|          | RCAN-DAN                          | 0.6127 | 0.6229 | 0.6030  | 0.6004   | 0.6657 | 0.6759 | 0.5632         | 0.5754          | 0.5470                | 0.5553               | 0.5508                                 |
|          | RCAN (trained on simple pipeline) | 0.5742 | 0.6000 | 0.3166  | 0.2976   | 0.7145 | 0.6953 | 0.2492         | 0.3197          | 0.2929                | 0.2979               | 0.2921                                 |
| Manga109 | Bicubic                           | 0.7041 | 0.7315 | 0.4972  | 0.5311   | 0.7131 | 0.7337 | 0.4783         | 0.5390          | 0.5001                | 0.4821               | 0.4898                                 |
|          | Lanczos                           | 0.7034 | 0.7347 | 0.4793  | 0.5135   | 0.7223 | 0.7428 | 0.4607         | 0.5236          | 0.4858                | 0.4642               | 0.4735                                 |
|          | RCAN (batch size 4)               | 0.8093 | 0.8173 | 0.7959  | 0.8028   | 0.8389 | 0.8446 | 0.7623         | 0.7777          | 0.7418                | 0.7468               | 0.7438                                 |
|          | RCAN (batch size 8)               | 0.8093 | 0.8182 | 0.7958  | 0.8017   | 0.8356 | 0.8397 | 0.7613         | 0.7784          | 0.7427                | 0.7467               | 0.7441                                 |
|          | RCAN (non-blind)                  | N/A    | N/A    | N/A     | N/A      | N/A    | N/A    | N/A            | N/A             | 0.7461                | 0.7469               | 0.7466                                 |
|          | RCAN (non-blind, no blur)         | N/A    | N/A    | N/A     | N/A      | N/A    | N/A    | N/A            | 0.7850          | 0.7443                | 0.7483               | 0.7469                                 |
|          | RCAN (non-blind, no noise)        | N/A    | N/A    | N/A     | N/A      | N/A    | N/A    | N/A            | N/A             | 0.7438                | 0.7453               | 0.7444                                 |
|          | RCAN (non-blind, no compression)  | N/A    | N/A    | N/A     | N/A      | N/A    | N/A    | 0.7657         | N/A             | 0.7477                | 0.7476               | 0.7470                                 |
|          | RCAN (MoCo)                       | 0.8072 | 0.8174 | 0.7947  | 0.8012   | 0.8268 | 0.8358 | 0.7617         | 0.7767          | 0.7419                | 0.7465               | 0.7436                                 |
|          | RCAN (WeakCon)                    | 0.8078 | 0.8177 | 0.7879  | 0.7901   | 0.8295 | 0.8370 | 0.7464         | 0.7758          | 0.7415                | 0.7465               | 0.7433                                 |
|          | RCAN (SupMoCo)                    | 0.8096 | 0.8193 | 0.7889  | 0.7999   | 0.8294 | 0.8380 | 0.7594         | 0.7793          | 0.7418                | 0.7471               | 0.7438                                 |
|          | RCAN (SupMoCo, all)               | 0.8091 | 0.8192 | 0.7922  | 0.8015   | 0.8309 | 0.8377 | 0.7575         | 0.7793          | 0.7409                | 0.7464               | 0.7432                                 |
|          | RCAN-DAN                          | 0.8111 | 0.8212 | 0.7959  | 0.8024   | 0.8398 | 0.8438 | 0.7626         | 0.7795          | 0.7442                | 0.7485               | 0.7456                                 |
|          | RCAN (trained on simple pipeline) | 0.7012 | 0.7575 | 0.3702  | 0.3997   | 0.8975 | 0.8600 | 0.3368         | 0.4332          | 0.3998                | 0.3266               | 0.3581                                 |
| Urban100 | Bicubic                           | 0.5791 | 0.5964 | 0.4485  | 0.4372   | 0.5737 | 0.5969 | 0.3804         | 0.4321          | 0.3868                | 0.4189               | 0.4014                                 |
|          | Lanczos                           | 0.5809 | 0.6016 | 0.4367  | 0.4241   | 0.5834 | 0.6069 | 0.3671         | 0.4206          | 0.3759                | 0.4083               | 0.3904                                 |
|          | RCAN (batch size 4)               | 0.6696 | 0.6842 | 0.6625  | 0.6614   | 0.7006 | 0.7086 | 0.6077         | 0.6329          | 0.5861                | 0.6074               | 0.5957                                 |
|          | RCAN (batch size 8)               | 0.6692 | 0.6834 | 0.6629  | 0.6601   | 0.6985 | 0.7063 | 0.6071         | 0.6340          | 0.5872                | 0.6071               | 0.5963                                 |
|          | RCAN (non-blind)                  | N/A    | N/A    | N/A     | N/A      | N/A    | N/A    | N/A            | N/A             | 0.5920                | 0.6074               | 0.5983                                 |
|          | RCAN (non-blind, no blur)         | N/A    | N/A    | N/A     | N/A      | N/A    | N/A    | N/A            | 0.6377          | 0.5885                | 0.6084               | 0.5971                                 |
|          | RCAN (non-blind, no noise)        | N/A    | N/A    | N/A     | N/A      | N/A    | N/A    | N/A            | N/A             | 0.5883                | 0.6059               | 0.5953                                 |
|          | RCAN (non-blind, no compression)  | N/A    | N/A    | N/A     | N/A      | N/A    | N/A    | 0.6122         | N/A             | 0.5929                | 0.6088               | 0.6000                                 |
|          | RCAN (MoCo)                       | 0.6686 | 0.6831 | 0.6626  | 0.6594   | 0.6886 | 0.7017 | 0.6052         | 0.6340          | 0.5874                | 0.6084               | 0.5968                                 |
|          | RCAN (WeakCon)                    | 0.6693 | 0.6836 | 0.6617  | 0.6511   | 0.6941 | 0.7037 | 0.5909         | 0.6348          | 0.5872                | 0.6080               | 0.5966                                 |
|          | RCAN (SupMoCo)                    | 0.6684 | 0.6834 | 0.6571  | 0.6538   | 0.6912 | 0.7042 | 0.5987         | 0.6343          | 0.5863                | 0.6079               | 0.5960                                 |
|          | RCAN (SupMoCo, all)               | 0.6676 | 0.6824 | 0.6592  | 0.6563   | 0.6968 | 0.7053 | 0.6005         | 0.6324          | 0.5852                | 0.6070               | 0.5952                                 |
|          | RCAN-DAN                          | 0.6719 | 0.6870 | 0.6657  | 0.6632   | 0.7027 | 0.7109 | 0.6094         | 0.6357          | 0.5891                | 0.6099               | 0.5985                                 |
|          | RCAN (trained on simple pipeline) | 0.5897 | 0.6481 | 0.3616  | 0.3396   | 0.7688 | 0.7395 | 0.2733         | 0.3490          | 0.3067                | 0.3216               | 0.3105                                 |



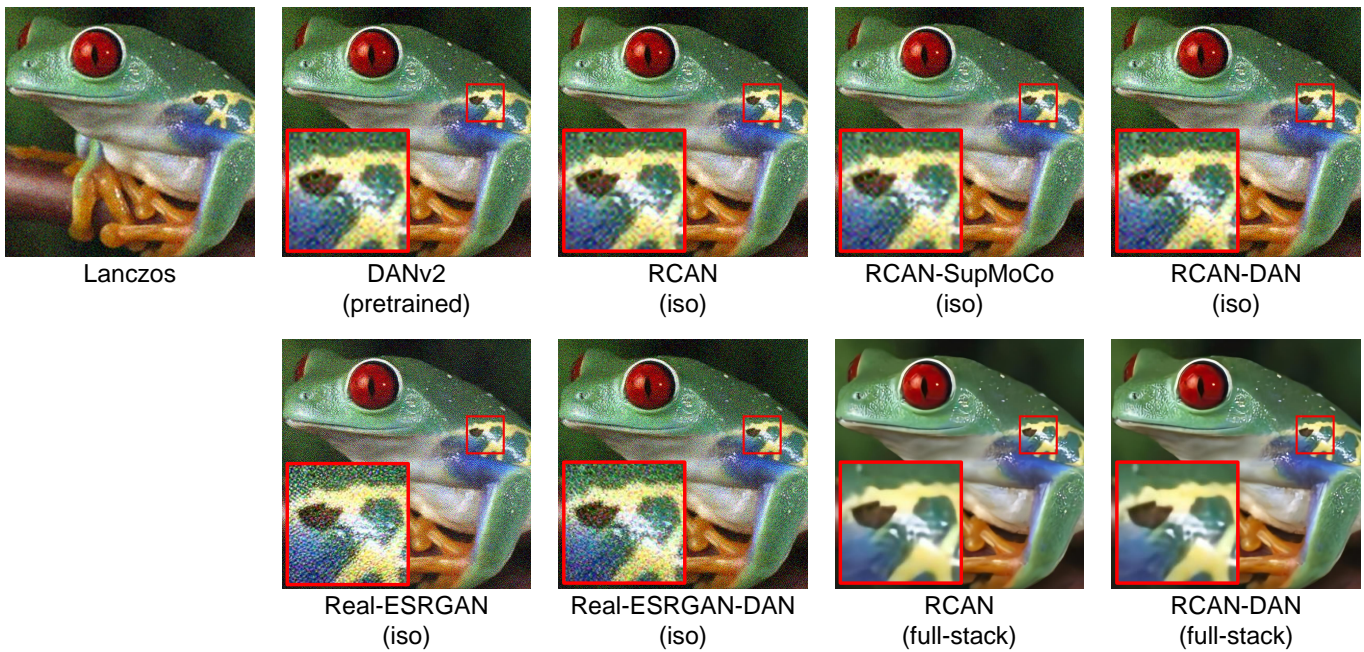

Figure S2: Comparison of the SR results of various models on the frog image from RealSRSet. All simple pipeline models (marked as iso) are incapable of removing the noise from the image. The complex pipeline models (marked as full-stack) produce significantly improved results.
